# Supplementary material for: rTMS Reduces Craving and Alcohol Use in Patients with Alcohol Use Disorder: Results of a Randomized, Sham-Controlled Clinical Trial
Source: MDPI journal article supplement (doi:10.3390/jcm11040951), 2022-02-11
Supplement: s1 [file s1]

## Supplementary Materials:

**Table S1:** ANOVA tests for three outcome variables of craving

|        | Wilks' $\Lambda$ | sig   | F     | df    |
|--------|------------------|-------|-------|-------|
| VAS    | 0.490            | 0.001 | 6.502 | 4, 25 |
| OCDS-5 | 0.729            | 0.084 | 2.323 | 4, 25 |
| AUQ    | 0.604            | 0.011 | 4.095 | 4, 25 |

**Table S2:** MANOVA tests on different time points for craving variables

|           | Wilks' $\Lambda$ | sig   | F     | df    |
|-----------|------------------|-------|-------|-------|
| 10 days   | 0.901            | 0.430 | 0.952 | 3, 26 |
| 1 month   | 0.649            | 0.010 | 4.681 | 3, 26 |
| 3 months  | 0.492            | 0.000 | 8.949 | 3, 26 |
| 12 months | 0.790            | 0.101 | 2.297 | 3, 26 |

**Table S3 (a)** Craving MANOVA without participants with PTSS at baseline

|  | Wilks' $\Lambda$ | sig   | F     | df     |
|--|------------------|-------|-------|--------|
|  | 0.174            | 0,019 | 3.943 | 12, 10 |

**Table S3 (b)** ANOVA tests for three outcome variables of craving, without participants with PTSS at baseline

|        | Wilks' $\Lambda$ | sig   | F     | df    |
|--------|------------------|-------|-------|-------|
| VAS    | 0,399            | 0.002 | 6.788 | 4, 18 |
| OCDS-5 | 0.665            | 0.102 | 2.265 | 4, 18 |
| AUQ    | 0.490            | 0.009 | 4.676 | 4, 18 |

**Table S4:** Overview alcohol outcome measurements after one year of follow-up

|                                | Total (N=30) |       | Real rTMS + TAU (n=14) |       | Sham + TAU (n=16) |       | F     | p     |
|--------------------------------|--------------|-------|------------------------|-------|-------------------|-------|-------|-------|
|                                | M            | SD    | M                      | SD    | M                 | SD    |       |       |
| % Abstinence at endpoint       | 0.06         |       | 0,14                   |       | 0,00              |       | 14.37 | 0.126 |
| Alcohol use total in mg        | 4604         | 3500  | 3161                   | 2716  | 5866              | 3694  | 1.349 | 0.032 |
| Alcohol use per day in mg      | 45.50        | 34,60 | 31.27                  | 26,80 | 57.94             | 36.59 | 1.42  | 0.03  |
| Time to relapse                | 181.0        | 154,9 | 256.4                  | 146.8 | 115.1             | 133.2 | 0.458 | 0.010 |
| Total number of abstinent days | 48.50        | 29,11 | 7007                   | 23.44 | 29.63             | 18.65 | 0.004 | 0.000 |
| Total number of HDD days       | 37.03        | 25,82 | 25.36                  | 20.18 | 47.25             | 26.41 | 1.478 | 0.018 |
